# Supplementary material for: Seasonal cycles of biogeochemical fluxes in the Scotia Sea, Southern Ocean: A stable isotope approach
Source: Copernicus journal article supplement (doi:10.5194/bg-2022-246), 2023-01-04
Supplement: Supplementary file 1 [file bg-2022-246-supplement.pdf]

## Seasonal cycles of biogeochemical fluxes in the Scotia Sea, Southern Ocean: A stable isotope approach

Anna Belcher<sup>1</sup>, Sian F. Henley<sup>2</sup>, Katharine Hendry<sup>1,3</sup>, Marianne Wootton<sup>4</sup>, Lisa Friberg<sup>3</sup>, Ursula Dallman<sup>2</sup>, Tong Wang<sup>3</sup>, Clara Manno<sup>1</sup>

<sup>1</sup> British Antarctic Survey, Cambridge, CB3 0ET, UK

<sup>2</sup> School of Geosciences, University of Edinburgh, Edinburgh EH9 3FE, UK

<sup>3</sup> University of Bristol, Bristol, BS8 1RJ, UK

<sup>4</sup> Marine Biological Association, Plymouth, PL1 2PB, UK

### Supplementary material

**Table S1: Sediment trap bottle opening timings. Dates and duration open correspond to both deep (2000 m) and shallow (400 m) traps.**

| Bottle number | Bottle open date | Days open |
|---------------|------------------|-----------|
| 1             | 25/01/2018       | 7         |
| 2             | 01/02/2018       | 14        |
| 3             | 15/02/2018       | 14        |
| 4             | 01/03/2018       | 31        |
| 5             | 01/04/2018       | 30        |
| 6             | 01/05/2018       | 31        |
| 7             | 01/06/2018       | 30        |
| 8             | 01/07/2018       | 31        |
| 9             | 01/08/2018       | 31        |
| 10            | 01/09/2018       | 30        |
| 11            | 01/10/2018       | 31        |
| 12            | 01/11/2018       | 30        |
| 13            | 01/12/2018       | 14        |
| 14            | 15/12/2018       | 17        |

A) Shallow ~350 m

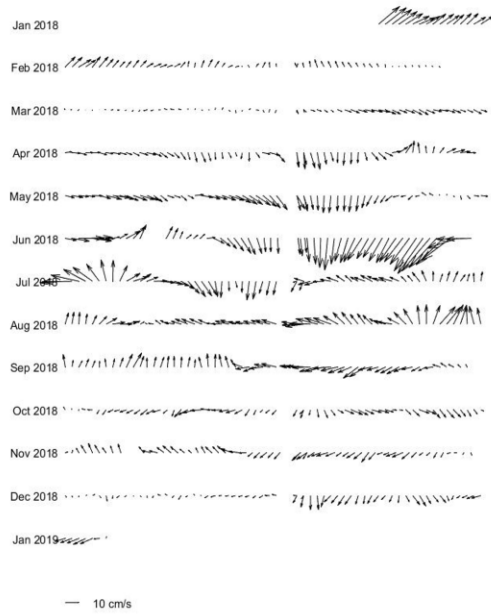

B) Deep ~2050 m

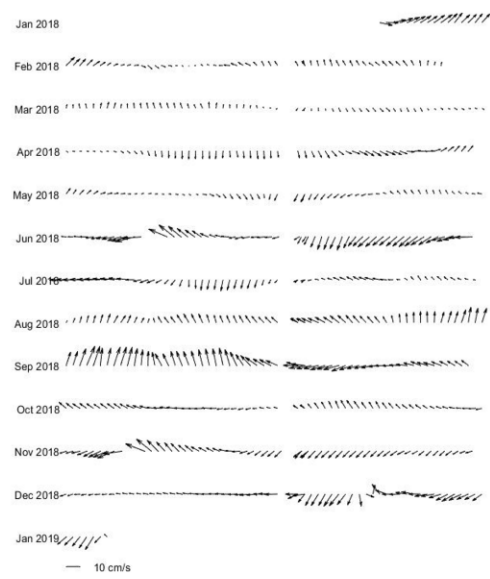

**Figure S1: Current vector stick plots of filtered (de-tided with 33-hour half amplitude period) current data. Smoothed data are shown every 12 hours. Arrow length scales to current speed, indicated by the scale bar, in cm/s.**

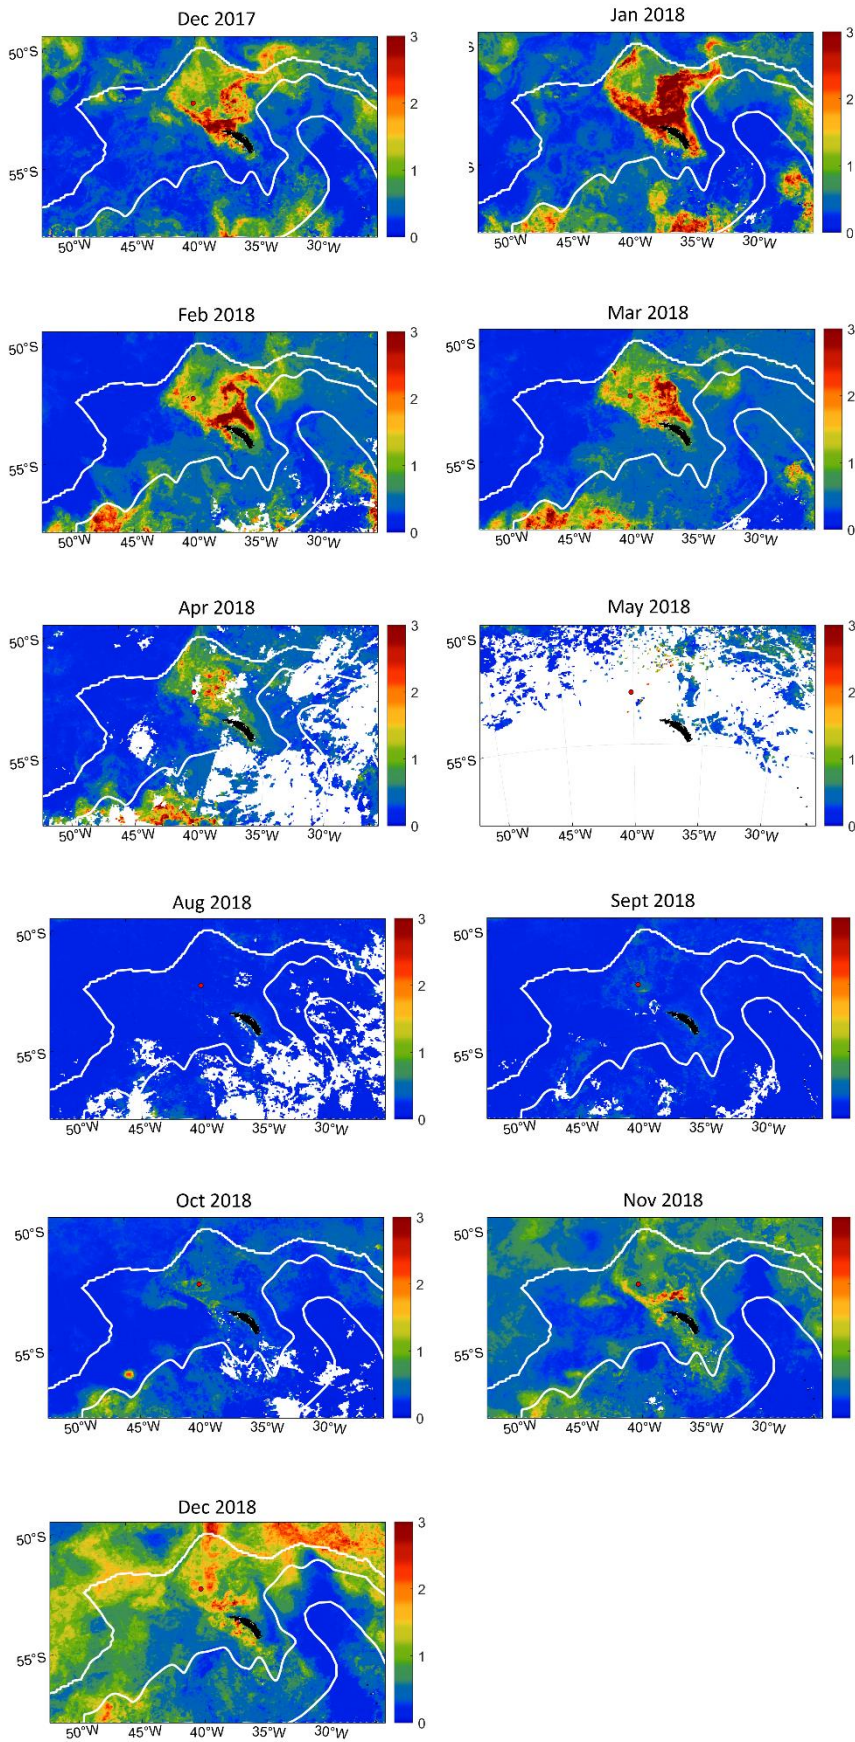

**Figure S2: Seasonal progression of satellite derived surface chlorophyll concentration ( $\text{mg m}^{-3}$ ). Data are monthly for Dec 2017- May 2018, and Aug 2018-Dec 2018, averaged from 8 day satellite chlorophyll data from the Ocean Colour CCI (version 5.0) (Sathyendranath et al., 2021, 2019). White lines indicate frontal positions of the Antarctic Polar Front (APF) (Moore et al., 1999), Subantarctic Circumpolar Current Front (SACCF) (Thorpe et al., 2002) and the Southern Boundary of the Antarctic Circumpolar Current (SB-ACC) (Orsi et al., 1995). P3 station is indicated by the red marker.**
