# Supplementary material for: Seasonal cycles of biogeochemical fluxes in the Scotia Sea, Southern Ocean: A stable isotope approach
Source: Copernicus journal article supplement (doi:10.5194/bg-2022-246), 2023-01-04
Supplement: Supplementary file [file bg-2022-246-AC1-supplement.pdf]

**Response to reviewers: Seasonal cycles of biogeochemical fluxes in the Scotia Sea, Southern Ocean: A stable isotope approach, by Belcher et al.**

**Reviewer 1**

**General comments**

In “Seasonal cycles of biogeochemical fluxes in the Scotia Sea, Southern Ocean: A stable isotope approach”, Belcher et al. present a study investigating the seasonal variations of organic matter (POC and PON) and biogenic silica fluxes from two sediment traps located north-West of South Georgia in the Scotia Sea (Southern Ocean). Using stable isotope approaches the authors examine the origin and some of the processes controlling the fluxes they have observed in the traps.

They investigated the differences between two productive events (in February 2018 – summer season – and December 2018 – spring season) and the coupling of C, N and Si fluxes during these events. Their main results are: Particulate fluxes and isotopic compositions were similar in the deep and shallow trap suggesting that most of the remineralization occurred in the upper layer of the water column. Despite a very noisy  $\delta^{15}\text{N}$  signal, the synchronicity of the  $\delta^{30}\text{Si}$  and  $\delta^{13}\text{C}$  signals highlight the coupling between these two elements and the significant role of diatoms in the export of C (and BSi) in the area. Based on the estimation of isotopic baselines associated with the two productive events, they also suggested a change in the source region of the material coming into the sediment traps.

Generally speaking, the results of this study are interesting. However, I found the manuscript rather hard to read, often unclear or confusing. I think that the manuscript would profit from an effort to make the structure of the discussion more easily understandable for the reader. More work can also be done regarding the description of the analytical and sample processing methods as well as data quality. Some important information is missing and/or unclear. But most importantly, I think the authors should re-think figure 3, which is one of the most (if not the most) important figure of the manuscript. Indeed, the way the figure is built does not support or illustrate the statements or hypothesis authors are attempting to demonstrate. Additionally, there are also some inconsistencies in the wording, and I would strongly encourage the authors to carefully read their manuscript again and have it read by an English-speaking person.

I detail these points below, together with minor points that the authors should also consider while carefully revising this manuscript. I recommend publication of this paper in “Biogeosciences” after major revisions.

**Reply: Thank you for taking the time to review our manuscript and for the helpful suggestions. We believe that we have improved the paper by addressing the points that you have raised. See our responses below. Where we quote line numbers we refer to the marked up version of the revised manuscript.**

**Major concerns**

Currently, the manuscript requires very careful reading (and re-reading) in order to understand the authors’ argumentation and get a sense of the various settings. A few suggestions:

\* Re-organizing the discussion based on the three main periods that are discussed in the manuscript. For example, having three subsections in chronological order (i) Early spring event (P2), (ii) Late summer event (P1), (iii) Winter hiatus; or to fit with the main figure of the manuscript (fig 3) (i) First export event (P1), (ii) Winter hiatus, (iii) Second export event (P2).

**Reply: Thank you for your suggestions to help improve the readability of the manuscript. We have broken section 4.2 up into 3 sections: productive period 1, winter hiatus and productive period 2**

as this we think fits well with our figures and other text in the manuscript. We keep the fluxes and isotopic ratios in separate sections to try and keep the isotope section as focussed and clear as possible. With three biogeochemical fluxes/isotopic ratios to describe over an entire season there are many complexities to untangle from our limited dataset and it is not a simple story to tell. We believe we have explained the different processes and hypothesis for our data more clearly in this revised version.

\* As it is, the manuscript needs desperately figures that will support the authors' hypothesis and statements for two main reasons: (i) Some important figures are missing. For example, figures illustrating the relationship between POC and BSi (mentioned for example L415) or  $\delta^{13}\text{C}$  and  $\delta^{30}\text{Si}$  (mentioned L422) with associated  $R^2$  and statistics. Right now, there is no figures to illustrate or support the relationship authors are discussing in the manuscript. (ii) Figure 3, the key figure of the manuscript, is currently very poorly designed. The choice of shading to represent fluxes in  $\text{mg m}^{-2} \text{d}^{-1}$  does not actually reflect the full magnitude of those fluxes. The most obvious example is POC flux in the shallow trap in May 2018. It seems to "peak" for a short period of time to values around  $8 \text{ mg m}^{-2} \text{d}^{-1}$  while it was sustaining this rate for a long period of time (31 days). Fluxes will appear less biased by using barplot representing the mean flux and error bar for the standard deviation. The variations of the isotopic composition of particles ( $\delta^{13}\text{C}$ ,  $\delta^{15}\text{N}$  and  $\delta^{30}\text{Si}$ ) are also poorly illustrated by the choice of representing only the min and max on the figure. A mean value with error bar will be more representative of the seasonal evolution of the signal, as well as of the heterogeneity of the material (when error bars are more widely spread). It will also help with the scattering of the  $\delta^{15}\text{N}$  and validate (or invalidate) the trends suggested by the authors.

\* Reply: We have added an additional figure (Figure 5) with the linear regressions suggested (see later response), and additionally we have changed figure 3 to have bars as well as a shadowed region to show the maximum and minimum. This allows us to display the shallow and deep sediment trap data on the same plot without obscuring values with the use of error bars, whilst still being clear about the range of values for the replicate splits analysed. The bars have a width proportional to the time period that the cup was open for clarity. For the isotope ratios we keep the use of the error bar in the bottom right-hand corner of each plot. This maintains clarity on the plot, preventing it from being too cluttered and illegible were there to be uncertainty shown for each individual point.

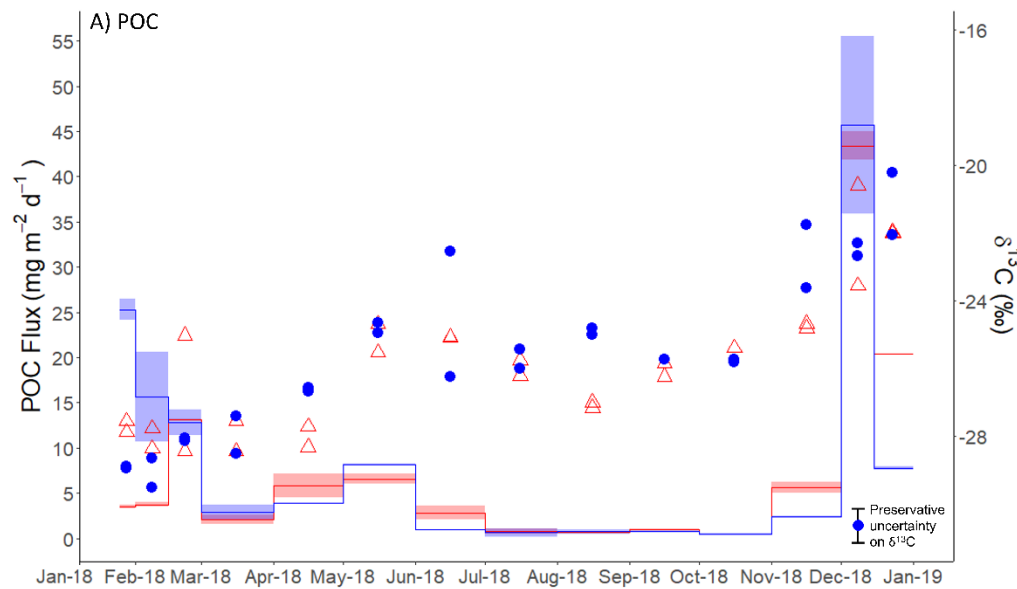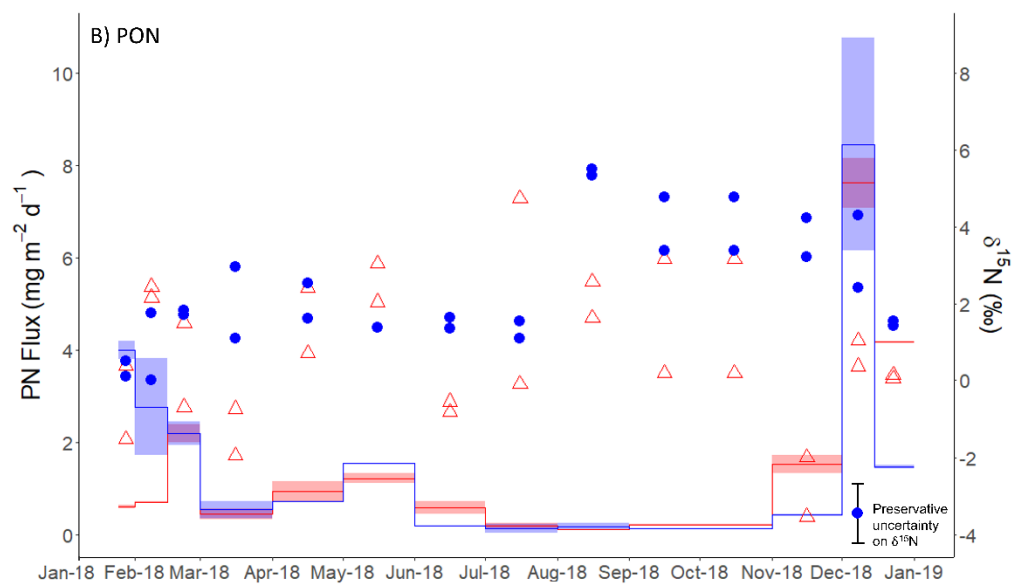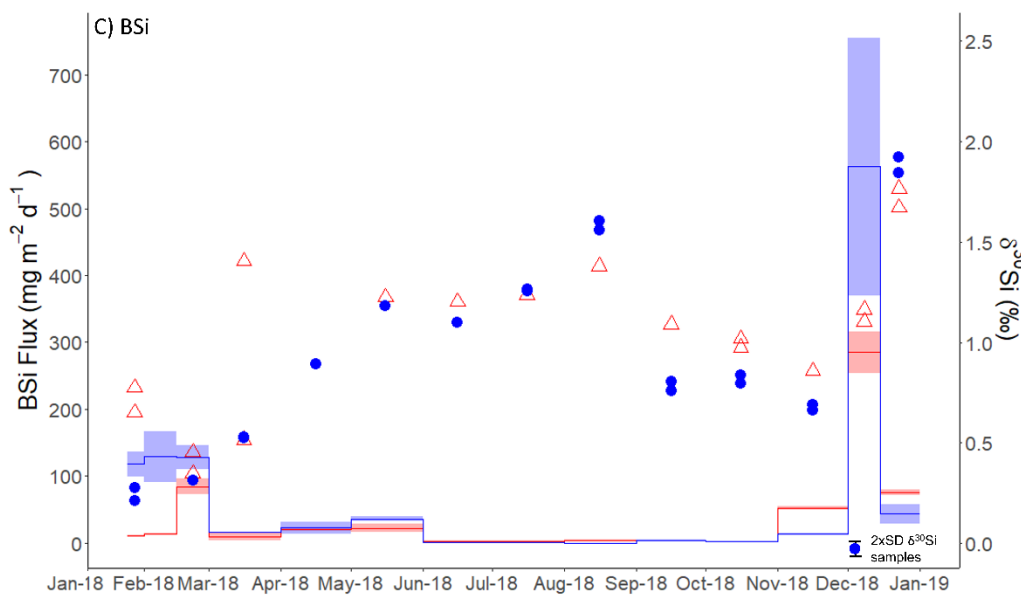

\* Something that need to be highlighted in the method section and briefly discussed later on is that the total collection period is 341 days. The first cup opened on Jan 25th (2018) and the last one closed on Jan 1st (2019). I would be worth it mentioning that the sediment trap series misses 3 weeks in the beginning of January where the flux is expected to be significant. Authors have not made any annual/seasonal integration of their fluxes, but they should still discuss the risk of missing a significant part of the seasonal flux early in the season. It might be of importance for the discussion regarding the isotope baseline for the first export event.

**Reply: We have added in the deployment dates in the methods, and also state on lines 311, where we define productive period 1, that we do not capture the first 3 weeks of January. In the discussion we say that the record does not extend beyond December 2018 so cannot determine if the isotope ratios would return to values akin to that of period 1. We remind the reader that we do not capture the first 3 weeks of January in the discussion (Lines 469 and 685).**

\* It is not clear in the method section if authors have used the different splits of samples as replicates or if they have combined splits to do their different measurements. Figure 3 gives two values for each measurement (a min and a max) so one can guess that authors have measured duplicates out of those splits. Going through the discussion section, authors start to mention these mean values that do not correspond to anything presented in figure 3. I do not see the point of plotting only the min and max on the figure while using a mean value in the text. This is confusing, make things unclear and prevent the figure to illustrate and support correctly the text (e.g. it is hard to see some of the trends that are discussed in the text). I am suggesting using the mean values in the figure with the corresponding error bar and add those error (as standard deviation) within the text.

**Reply: As noted below we have tweaked the text to clarify that for each sediment trap sample bottle, splits were taken for the different analyses, and typically two splits were used for each analysis – thus giving two replicates. The values of these are plotted in the figure as the maximum and minimum. In the text, we feel it is most useful to give the mean of our sediment trap sample replicates (from multiple splits of the same sediment trap sample bottle), since this keeps the text concise. To avoid confusion, we define at the start of the results that we are referring to the mean result for each sediment trap bottle based on available split samples, and remove the use of the word mean in these instances. We add in the following lines (320-322) to explicitly state this at the start of the results section.**

*“Since two to three splits were analysed from each sediment trap bottle, we refer here to the mean flux for each sediment trap bottle based on the available splits for that bottle.”*

**Since typically we only have two splits per sample, we believe the range to be an informative way of illustrating the spread of our results. In the new bar plot for figure 3 we plot the mean flux value and use shading to show the maximum and minimum flux value.**

\* Please define what “isotopic baselines” is. It is not defined anywhere in the manuscript, neither it is explained how authors have estimated the different baseline they are referring to. If it is just the lightest isotopic signature recorded just before a productive (and export) event, I am suspicious with the isotopic baseline identified for the first event since a significant part of the flux might have been missed early January 2018. Moreover, the isotopic baselines are not identified in figure 3 neither in Table 1. In general, this last part of the discussion (related to the comparison of the different isotopic baselines) is quite confusing and unclear and need some serious rephrasing.

**Reply: To avoid confusion we have removed all mention of the term isotopic baseline in the manuscript**

## **Minor concerns**

### *Introduction*

\* L43 Use biological pump of carbon instead of BCP.

**Reply:** Here and throughout we remove the acronym BCP and use the standard terminology in the literature of ‘the biological carbon pump’.

\* Sediment traps have bias too. A short summary (one-two sentences + ref) of them would be useful here. Especially since authors discuss some of them later in the manuscript.

**Reply:** Added in the following lines:

*“Sediment traps can be susceptible to collection biases depending on the depth of deployment, trap design, hydrodynamic conditions and properties of sinking particles (Buesseler et al., 2007). Moored sediment traps can underestimate the actual flux at depths shallower than ~1500 m by collecting only a portion of the sinking material, though biases vary greatly between sites (Buesseler et al., 2007).”*

\* L73 Use “challenges” instead of “complications”

**Reply:** Changed as requested

\*Does sea-ice affect the region where the traps are located? It has been shown that the occurrence of sea ice can significantly affect stable isotopes composition (at least for d13C - e.g. Kennedy et al. 2002 - and d30Si - e.g. Fripiat et al. 2007). This could be an important aspect to consider in your discussion.

**Reply:** Sea ice does not reach this region, thus we do not discuss it.

\*The processes controlling the stable isotopic composition of C and N are quite well introduced but authors have been very quick concerning d30Si. More information about fractionation and the processes controlling it need to be introduced here (e.g. difference in fractionation between polar diatom species - Sutton et al. 2013 – fractionation (or not) associated with biogenic silica dissolution - Demarest et al. 2009, Wetzel et al. 2014).

**Reply:** We have added the following additional text here (lines 97-110)

*“During uptake of DSi, diatoms fractionate the stable isotopes of silicon (28Si, 29Si, 30Si) preferentially taking up the lighter isotopes during cell wall (frustule) formation (De La Rocha et al., 1997). This means that BSi fluxes and ratios of light 28Si to heavy 30Si (expressed as  $\delta^{30}\text{Si}$ ) in sinking particulate organic matter (POM) can be informative about DSi utilisation by siliceous phytoplankton. The fractionation of Si isotopes during diatom DSi utilisation is approximately -1.1 ‰, although estimates of this value vary in laboratory and field studies between -0.5 and -2.5 ‰ (Hendry and Brzezinski, 2014). Whilst some studies have shown that isotopic fractionation is independent of temperature, DSi and diatom species (e.g., De La Rocha et al., 1997), one in vitro laboratory culture experiment revealed a potential species effect, with polar species exhibiting more extreme fractionation (-2.09 ‰ for *Chaetoceros* sp. and 0.54 ‰ *Fragilariopsis kerguelensis*, Sutton et al., 2013). The impact of water column dissolution on frustule  $\delta^{30}\text{Si}$  is poorly constrained, with experimental evidence for either a small fractionation of -0.55 ‰ (Demarest et al., 2009) or a negligible impact (Wetzel et al., 2014; Egan et al., 2012; Grasse et al., 2021).”*

\*L115-116 what is the difference between annually and seasonally? Are they calculated over a different period?

**Reply:** Wording amended to clarify (line 133-136):

*“Faecal pellets (up to 91 % in late spring and early summer seasonally, Manno et al., 2015), krill exuviae (up to 47 % in summer, Manno et al., 2020) and diatoms, particularly resting spores (annual contribution of 42 %, Rembauville et al., 2016)...”*

\* Do the stable isotopes really give information about the actual composition of organic matter?

**Reply:** rephrased as follows (lines 137-142):

*“Here we use  $\delta^{13}\text{C}_{\text{POC}}$ ,  $\delta^{15}\text{N}_{\text{PN}}$  and  $\delta^{30}\text{Si}_{\text{BSi}}$  alongside calculated fluxes of POC, PN and BSi as tools to reveal information about sinking particulate organic matter and the processes influencing its production and subsequent flux to depth. More in-depth understanding of the composition, and thus the drivers of POC flux in this important region are key to improving estimates of the current and future strength of the biological carbon pump and the ocean’s role as a CO<sub>2</sub> sink.”*

\* Perhaps what is missing in the introduction is a paragraph about why is the composition of particles important for the biological pump of carbon? For example, it will affect the sinking speed of particles (and authors discuss this later), their recycling in the water column (and later within the sediment) etc.

**Reply: Added following line in opening paragraph of introduction (lines 50-52):**

*“The composition of particles affects the sinking rate, lability and thus degree of remineralisation as they sink through the water column (e.g. Ploug et al., 2008; Giering et al., 2020).”*

#### *Material and Methods*

\* L152-153 it would be interesting to quantify this effect in percent of the signal

**Reply: Added in the following text (lines 172-175).**

*“Previous studies have reported the effects of formalin on  $\delta^{13}\text{C}_{\text{POC}}$  and  $\delta^{15}\text{N}_{\text{PN}}$  to be small ( $\pm 1\%$  and  $\pm 1.5\%$  respectively, Mincks et al., 2008 and references therein). This equates to 13% and 16% of the maximum range measured in our study, which is small compared to the isotopic shifts we observed.”*

\* L168 splitted

**Reply: The use of split here is correct, thus we do not change it.**

\* It is not clear in the different paragraphs of the method section if these splits were combined or analyzed separately as replicates. If it is the second option (which is my guess) these replicates can be used to calculate the error or std on the samples as the potential heterogeneity of the sample will be reflected by a large error bar on the sample.

**Reply: Splits were taken from one sediment trap sample and analysed separately as replicates. This is the range we use in the shading in figure 3 since, as you say, the sample heterogeneity brings a large range. Text has been tweaked in the methods to clear this up. We have altered figure 3 as suggested, and the range (max to min) is shown by shading to highlight the uncertainties.**

\* L183 “per mil” instead of “per mille”

**Reply: per mille is correct so we have kept this**

\* Please define the meaning of “PACS international standard”

**Reply: We have added the full description: PACS-2 marine sediment reference material.**

\* L191 several statistical errors have been described here, although it is mentioned later in the manuscript, authors should indicate which one they have associated to their measurement).

**Reply: We state in the methods the likely uncertainty surrounding the formalin preservative on C and N isotope ratios, stating that this is larger than analytical uncertainties. We state this in both section 2.2 and 2.3.1. We represent these uncertainties on the isotopic ratios visually on figure 3 with the error bar in the bottom right corner, as detailed in the caption. As explained later we use pooled variances to quantify the uncertainties on the calculation of the seasonal flux-weighted isotopic ratio.**

\* It would be interesting to quantify those splits in percent of the total sample

**Reply: Splits ranged from 0.008 of a sample to 0.12 of a sample. This is based on the quantity of material collected in the cup and the amount needed for analysis of the different isotopes/fluxes. We do not think this information adds any value to the analysis so do not add this in to keep the manuscript as concise and clear as possible.**

\* What about lithogenic silica? Alkaline extraction method using NaOH will dissolve some lithogenic material along with BSi (Ragueneau et al. 2005). Because LSi has a light  $\delta^{30}\text{Si}$  (down to  $-2.3$  ‰, Opfergelt and Delmelle 2012), it has the potential to bias BSi  $\delta^{30}\text{Si}$  measurements even with low LSi contribution (or contamination) to the alkaline digestion. For example, and in the worst-case scenario of LSi  $\delta^{30}\text{Si}$  of  $-2.3$  ‰, a contribution of 3% during period 2 and 4% during period 1 would significantly bias the result (by  $0.1$  ‰). This is a rough calculation, but this needs to be discussed as sediment traps can collect a significant amount of lithogenic material. Note that methods have been proposed to “correct” BSi  $\delta^{30}\text{Si}$  from LSi contamination (see Closset et al 2015).

**Reply: Many thanks for this suggestion. The reviewer is correct that there is potential for lithogenic contamination with the method that was used. However, we do not have the required Al/Si data from the samples due to sample limitation, and do not have robust information about the Al/Si content of the potential endmembers in this region, and so have decided against introducing uncertainty by attempting a lithogenic correction. As noted by the reviewer, the potential bias from such lithogenic contamination is an order of magnitude smaller (c.  $0.1\%$ ) compared to the signal observed (over  $1\%$ ). Furthermore, the excellent reproducibility between replicates suggests against contamination, which is unlikely to be consistent from sample to sample.**

**To address this, we have added the following to the text (lines 259-262):**

*“A lithogenic correction (e.g., Closset et al., 2015) was not carried out on these samples. However, even an extreme scenario of variable lithogenic contamination of 1-5% of isotopically light marine clays (with  $\delta^{30}\text{Si}$  of  $-2.3\%$ ; Opfergelt and Delmelle, 2012) would only result in a potential systematic offset of  $0.12\%$ , which is an order of magnitude smaller than the observed seasonal signal.”*

\* L206 HCL or Milli-Q water as eluent?

**Reply: Wording altered here for clarification**

*“For Si isotope analysis, supernatants and reference standards were purified by passing through cation exchange columns (Bio-Rad AG50W-X12, 200-400 mesh resin) pre-cleaned with HCl following Georg et al. (2006).”*

\* L222 This sentence is unclear. what are those pseudo replicates? two samples per pseudo replicates so four isotopic measurement per bottle? Isn't the case for all isotopic measurements (and for POC and PON fluxes too)?

**Reply: we have deleted the term pseudo replicates for clarity. Two or three splits (depending on material availability and analysis possible) were taken from each sediment trap and analysed separately. This was the case for all of the different measurements. We have tweaked the wording to make this clearer.**

\* L224 reference materials instead of reference standard

**Reply: Done**

\* L230-233 please refer to the figures

**Reply: Done**

\* L235 which periods? please clarify

**Reply: Done**

*Results*



\* Figure 2: It would be valuable to start at least one month before the starting of the sampling period. Because there is a lag between the timing of particles produced in the ML and when they reach the sediment trap, we are missing the peak of Chl a that corresponds to the material collected in the first cup. Moreover, it will be useful to have the timing of the peaks illustrated (arrows for example) on the figure as well. Please add a legend too.

**Reply: Thank you for the helpful suggestions , we have made these changes**

\* Figure 3: Please see my previous comments in the “Major concerns” section.

**Reply: Amended as detailed above**

\* Authors mentioned that there is a time lag in the flux of particles between the two traps but not in the stable isotopic composition (e.g.  $\delta^{13}C$ ). It will be interesting to discuss the reason of this difference.

**Reply: For both isotope ratios and fluxes, whether we see a lag or not depends on the balance between the sampling resolution and the abruptness in the change of the magnitude and composition of the sinking material. There is a time lag between the flux of particles reaching the deep and shallow traps, in that the majority of particles reach the deep sediment trap later due to the time taken to sink deeper. However, the start of the productive flux events is captured in both traps with no lag, highlighting fast sinking material (at least within the temporal resolution of the sampling cup). We discuss in lines 347-354 the possible inferences about sinking velocity that can be made by examining the lags between fluxes. Considering the low background flux of material over winter, only a small amount of additional material would be needed to impact the stable isotope ratios, thus we do not see the time lag here. There is likely some lag in the isotope ratios, but not that we can capture in the temporal resolution of the sediment traps.**

\* Table 1: It seems that replicate have been made so sd can be calculated and error can be propagated to better represent the error associated with the value presented in this table (for methods to propagate error see for example the Eurachem publication “Quantifying Uncertainty in Analytical Measurement”)

**Reply: Considering the small number of repeat measurements, we chose to use pooled variances as a measure of uncertainty and have used these in table 1 in place of the uncertainties surrounding the formalin preservative. Where the number of degrees of freedom is small (i.e. with 2 repeat measurements, as in our case), the 95% confidence interval for the standard deviation is 0.03-2.24  $\sigma$ , which is a range that spans a factor of almost 100. Pooling 10 such twice measured samples gives a 95% confidence of the sample interval of 0.57-1.4  $\sigma$ . Pooling the variance of measurements (i.e. from each sediment trap cup measured) made within the time period of interest (here, full season, period 1 and period 2, DOF = X, Y and Z respectively), increases the robustness of the uncertainty estimate. This method assumes that the underlying distributions from which the data are drawn all have the same scatter. Table 1 has been appended with these pooled variances, and the caption amended to state that we use pooled variance as a measure of uncertainty on the seasonal flux-weighted isotopic ratios.**

\*L352 It would be great to mention which cup have been chosen for the microscopic analysis in the method section: Moreover, the deep and shallow cups seem to be from a different period in March 2018. Please explain why and/or any bias associated with this choice or correct the misalignment in the figure.

**We add in a reference to table 2 where the cup timings for these samples are given. Samples were chosen to capture the peak fluxes in each sediment trap. The peaks do not align exactly in period 1 for deep and shallow traps, hence differed periods were chosen, this information is given in the text (lines 414-415):**

*“Eight samples (four deep and four shallow, table 2) were analysed by light microscope for phytoplankton composition to cover the high productivity periods 1 and 2.”*



*Discussion*

\* L385 Perhaps specify that the timing fits but not the magnitude of the peaks.

**Reply: Our text explains this, as follows.**

*“The seasonal cycles of POC agree well with previously published work at the same location (Manno et al., 2015), with peaks in austral spring and late summer, though the peak POC fluxes recorded here (means of  $45.7 \text{ mg C m}^{-2} \text{ d}^{-1}$  and  $43.4 \text{ mg C m}^{-2} \text{ d}^{-1}$ , in shallow and deep traps respectively) are higher than those observed in previous years ( $22.9 \text{ mg C m}^{-2} \text{ d}^{-1}$ ; Manno et al., 2015).”*

\* L388 Please use “additional” instead of “third” since this peak is between the two main peaks

**Reply: Done**

\* L390 “PN fluxes followed the same seasonal trend as POC” please develop a little bit more, is it expected? why?

**Reply: We have added the following text in the discussion (lines 455-460):**

*“PN fluxes followed the same seasonal trend as POC for both deep and shallow traps suggesting a similar source. The similar magnitude of POC:PN ratios in period 1 in the two traps support consistency in the degree of degradation at these depths. The lower POC:PN ratios measured in the deep trap between August and October, compared to the shallow trap are consistent with a divergence in  $\delta^{15}\text{NPN}$  ratios, and could relate to a change in source material and/or degradation state between the two traps at this time.”*

\* L409 and after: higher sinking rates could also explain the observations and are consistent with no time lag in 2nd event compared to 1st event

**Reply: we have added sinking rates in more explicitly as another explanation (see line 484).**

\* L415 A figure with simple linear regression would have illustrated this statement.

**Reply: We have added in the following figure (figure 5).**

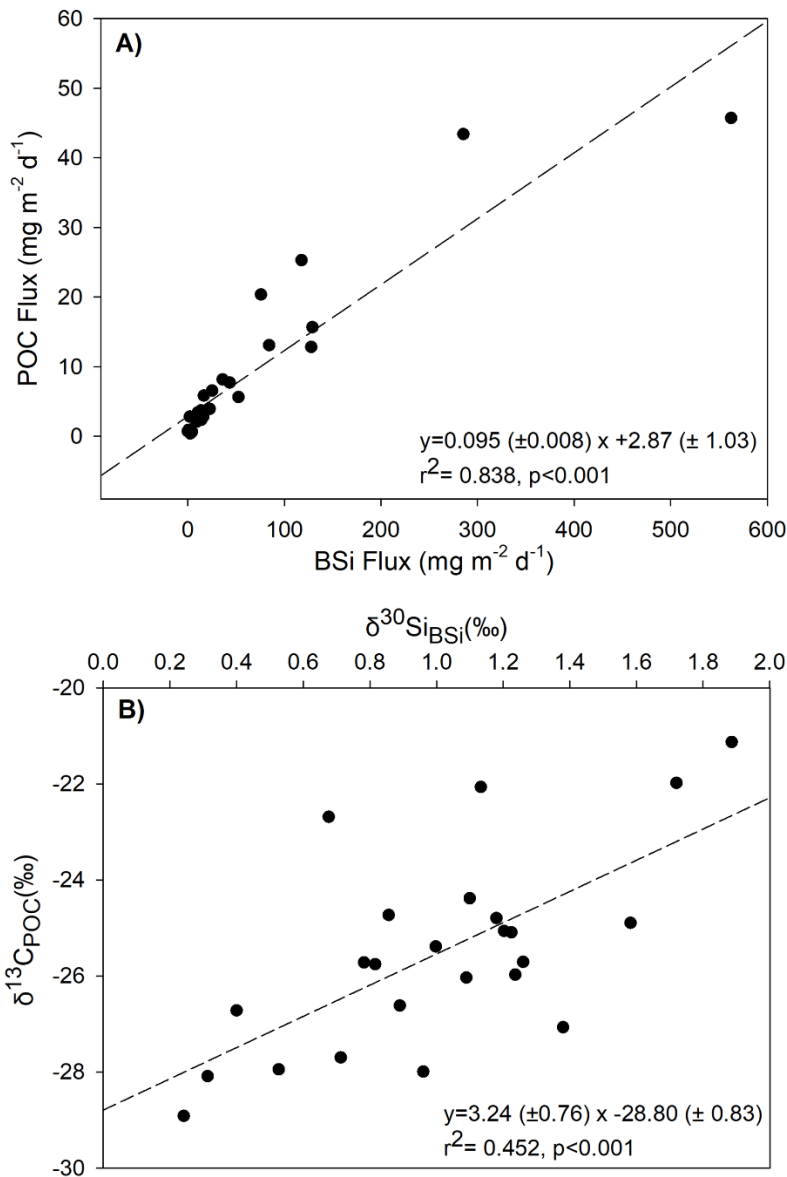

\* L421 “variations” instead of “shifts”

Reply: Done

\* L422-423 Here too it needs a figure to illustrate this linear regression

Reply: Added, as above

\* L427 If I'm correct, all diatoms belong to Bacillariophyceae not just Fragilariopsis spp

Reply: yes, thank you for spotting this. We have changed the wording to:

*“This is consistent with the dominance of diatoms (Fragilariopsis spp.) in the trap material”*

\* L428-430 The low BSi  $\delta^{30}\text{Si}$  at the beginning of the bloom is likely explained by a Si source that is already light, rather than more fractionation from diatom such as suggested. Using simple (not perfect) conceptual models such as Rayleigh or Steady-state, one can estimate the isotopic value of this source of Si. Diatoms at the end of summer also fractionate Si isotopes but they use a Si source that is enriched in  $^{30}\text{Si}$  (higher  $\delta^{30}\text{Si}$  value). Light  $\delta^{30}\text{Si}$  can also come from bias due to the presence of LSi that would be more important early spring (perhaps brought from ice drafts?).

**Reply: Many thanks for this comment. Please see response to the comment below.**

\* L473 “significant” instead of “sharp”. Using conceptual models and an estimation of the isotopic signature of the Si from deeper water (same as the early spring Si source for example?), one can estimate the amount of Si supplied to the ML (see Fripiat et al 2011 for the methods using seawater samples and Closset et al 2015 for the methods applied to sediment trap samples). Although, there is no chl a in August in figure S2, so the uptake in the surface layer is probably not significant during this period. Additionally, what about LSi contribution to those samples?

**Reply: Many thanks for these suggestions. We had considered including such a conceptual model. However, as the reviewer notes, these models are highly conceptual and we consider them – in our case – to be under-constrained and unlikely to shed additional light on the interpretation. In addition, given the balance of the paper between the C, N, and Si results, if we were to model the Si component of our findings then it would also be logical to model the C and N components. Such modelling efforts would be out of the scope of the current study. As such, we respectfully suggest that this modelling work is not required for this manuscript. Please also see our comment above regarding the lithogenic contamination.**

\* L498-500 In the deepest trap, the error associated to mean value in July is probably too high to conclude anything about a trend in  $\delta^{15}\text{N}$ . It could be increasing only from June to August, just as in the shallowest trap. Although I am not against the hypothesis of material coming from different sources and at different stage of degradation, which is very likely during this time of the year.

**Reply: We have removed some text from here and edited the wording so we do not overstate any trend in the deep  $\delta^{15}\text{N}$  at this time.**

\* L504-505 Unclear

**Reply: We have amended these lines to make them clearer**

\* L527 Please define “isotopic baselines” as it is not explained anywhere in the manuscript. Moreover, there is no baseline shown in figure 3 neither in Table 1. How is this isotopic baseline estimated?

**Reply: To avoid confusion, we have removed the use of the word baseline in this context from the manuscript.**

\* L539 Another linear regression that needs to be illustrated by a figure (at least in supplementary materials)

**Reply: We feel that the point we are making is sufficiently evidenced by statistics and do not add the figure requested as this will clutter the manuscript to add 4 regression plots.**

\* L568 and after: What about the case of a continuous, or semi-continuous supply of DSi to the ML? or the influence of open water vs. sea ice diatoms? Also, same comment as in L473, the magnitude of Si supplied to the ML can be estimated using simple conceptual models. Also, a BSi  $\delta^{30}\text{Si}$  of 0.48 ‰ will correspond to a Si source with a  $\delta^{30}\text{Si}$  of  $\sim 1.68$  ‰, which is not too light compared to the  $\delta^{30}\text{Si}$  value of Southern Ocean deep water that can be considered as the Si source (e.g. in a quite similar configuration, WW Si source above the Kerguelen plateau has a  $\delta^{30}\text{Si}$  of 1.71 ‰, Closset et al 2016)

**Reply: Please see comment above regarding the conceptual modelling. Also, please note that the study area does not experience sea ice, and so sea-ice diatoms are unlikely to be present.**

\* L578 Closset et al. 2022 and Cassarino et al. 2020 as reference for pore water  $\delta^{30}\text{Si}$  and diffusive Si flux from sediments in the Southern Ocean

**Reply: Added**

\* L606 If faecal pellets or moults have been counted it has to be presented in a figure (at least in the supplementary material).

### **Reply: These were not counted**

#### *Conclusion*

The conclusion (and not summary) is generally confusing and need some work to make it clearer. Although I tend to agree with the statements authors are providing, the data presented in this manuscript unfortunately do not support the conclusion (they probably have the potential to do it if better presented and described in the figures)

**Reply: We have edited the conclusions, and shortened the section to remove statements that are not supported by the manuscript.**

*“The seasonal cycles in primary productivity and nutrient uptake in surface waters at our study site in the Scotia Sea are reflected in the fluxes and isotopic ratios of sinking particulate material. We find that most remineralisation occurs in the upper 400 m of the water column and below this the magnitude of the flux of sinking material is relatively consistent, supported by consistency in POC:PON ratios. We find that particulate fluxes of C, and BSi are tightly coupled which highlights the importance of siliceous material in the transfer of POC to depth. We suggest that a change in phytoplankton community structure can at least part explain the shifts in carbon isotopic composition between the two productive periods measured here. Though complex, seasonal patterns in isotopic composition of particulate material reaching the sediment traps do reflect the degree and type of nutrient utilisation in the source waters. Our data also suggests an importance of laterally supplied material to the sediment traps and supports seasonal differences in source regions. Our results highlight how, through more detailed mechanistic understanding of the drivers of POC flux, and biogeochemical cycling, we can improve estimates of the current and future strength of the biological carbon pump and the ocean’s role as a CO<sub>2</sub> sink.”*

#### *References*

Please correct errors in the references (e.g. L791, L797)

**Reply: Added page number and volume number**
